# Supplementary material
Source: PubMed Central journal article supplement (PMC4336527)
Supplement: jn.114.203489_nutrition203489SupplementaryData1.pdf [file jn.114.203489_nutrition203489SupplementaryData1.pdf]

## Online Supporting Material

Supplemental Table 1. Candidate genes for magnesium homeostasis in human.

| Gene Symbol /<br>Protein Name | Gene Name                                             | Location      | Biological Function                                                            |
|-------------------------------|-------------------------------------------------------|---------------|--------------------------------------------------------------------------------|
| <i>CLDN16</i>                 | Paracellin-1 or claudin-16                            | Cell membrane | Paracellular calcium and magnesium fluxes in the nephron                       |
| <i>CLDN19</i>                 | Claudin-19                                            | Cell membrane | Renal calcium and magnesium reabsorption                                       |
| <i>SLC41A1</i>                | Solute Carrier Family 41<br>Member 1                  | Cell membrane | Relatively nonselective cellular magnesium and other divalent cation transport |
| <i>SLC41A2</i>                | Solute Carrier Family 41<br>Member 2                  | Cell membrane | Cellular magnesium and other divalent cation transport                         |
| <i>SLC12A3</i>                | Solute Carrier Family 12<br>Member 3                  | Cell membrane | Renal sodium, chloride, and magnesium reabsorption                             |
| <i>CNNM1</i>                  | Cyclin M1                                             | Cell membrane | Cellular divalent cation transport                                             |
| <i>CNNM2</i>                  | Cyclin M2                                             | Cell membrane | Cellular divalent cation transport                                             |
| <i>NIPA1</i>                  | Non-imprinted in Prader-<br>Willi/Angelman syndrome 1 | Cell membrane | Cellular magnesium transport                                                   |

Online Supporting Material

|                |                                                   |                                |                                           |
|----------------|---------------------------------------------------|--------------------------------|-------------------------------------------|
| <i>NIPA2</i>   | Non-imprinted in Prader-Willi/Angelman syndrome 2 | Cell membrane                  | Cellular magnesium transport              |
| <i>ZDHHC17</i> | Zinc finger, DHHC-type containing 17              | Cell membrane                  | Cellular magnesium transport              |
| <i>MRS2</i>    | Mitochondrial RNA Splicing 2                      | Mitochondria                   | Mitochondrial magnesium homeostasis       |
| <i>MMGT1</i>   | Membrane magnesium transporter 1                  | Golgi system                   | Regulation of magnesium dependent enzymes |
| <i>FXVD2</i>   | FXVD domain containing ion transport regulator 2  | Cellular member in the nephron | Renal sodium and magnesium handling       |

Online Supporting Material

Supplemental Table 2. Odds Ratios and 95% confidence intervals<sup>1</sup> for top 10 associations (ranked by nominal p-values among African Americans) between ion channels related genes and diabetes risk in the WHI-SHARe cohort (n=10,572).

| Locus         | SNP       | Major/Minor Allele | Minor Allele Frequency (AA/HA) <sup>2</sup> |           | African Americans (n=7,287) |                                | Hispanic American (n=3,285) |         |
|---------------|-----------|--------------------|---------------------------------------------|-----------|-----------------------------|--------------------------------|-----------------------------|---------|
|               |           |                    | Cases                                       | Controls  | OR (95% CI)                 | P-value (FDR adjusted p-value) | OR (95% CI)                 | P-value |
| <i>CNNM1</i>  | rs6584273 | G/A                | 0.20/0.05                                   | 0.22/0.05 | 0.81 (0.72,0.90)            | <0.001<br>(0.01)***            | 1.03 (0.74,1.44)            | 0.84    |
| <i>CLDN16</i> | rs4438632 | G/A                | 0.04/0.25                                   | 0.03/0.22 | 1.41 (1.10,1.75)            | 0.002<br>(0.06)*               | 1.03 (0.85,1.26)            | 0.74    |
| <i>ABCC8</i>  | rs7947462 | G/A                | 0.07/0.23                                   | 0.09/0.24 | 0.78 (0.67,0.92)            | 0.003<br>(0.19)*               | 0.89 (0.73,1.08)            | 0.22    |
| <i>CLDN16</i> | rs1593313 | T/C                | 0.06/0.32                                   | 0.05/0.29 | 1.32 (1.10,1.59)            | 0.003<br>(0.06)*               | 1.05 (0.86,1.28)            | 0.63    |
| <i>TRPM7</i>  | rs2011064 | C/G                | 0.19/0.46                                   | 0.17/0.45 | 1.19 (1.10,1.34)            | 0.005<br>(0.17)*               | 1.09 (0.89,1.35)            | 0.41    |

Online Supporting Material

|                |            |     |           |           |                  |                  |                  |      |
|----------------|------------|-----|-----------|-----------|------------------|------------------|------------------|------|
| <i>SLC12A3</i> | rs9921780  | A/G | 0.50/0.39 | 0.48/0.40 | 1.21 (1.10,1.38) | 0.005<br>(0.14)* | 1.06 (0.87,1.29) | 0.55 |
| <i>TRPM6</i>   | rs7046143  | T/C | 0.30/0.24 | 0.27/0.22 | 1.17 (1.00,1.31) | 0.01<br>(0.26)*  | 1.03 (0.85,1.25) | 0.77 |
| <i>CNNM1</i>   | rs41444048 | G/C | 0.17/0.02 | 0.19/0.02 | 0.85 (0.75,0.96) | 0.01<br>(0.20)*  | 1.00 (0.63,1.61) | 0.98 |
| <i>ABCC8</i>   | rs7111475  | G/A | 0.11/0.03 | 0.13/0.03 | 0.84 (0.73,0.96) | 0.01<br>(0.30)*  | 1.01 (0.69,1.48) | 0.95 |
| <i>TRPM7</i>   | rs3109894  | C/T | 0.30/0.47 | 0.28/0.46 | 1.16 (1.00,1.30) | 0.01<br>(0.17)*  | 1.08 (0.87,1.33) | 0.49 |

<sup>1</sup>Odds Ratios (OR) and 95% confidence interval (CIs) were computed using dominant model with multivariate logistic regression models.

Adjusted for age, region, and three principal components of global ancestry.

<sup>2</sup>AA: African American; HA: Hispanic American.

\*Nominal p-values  $\leq 0.05$ .

\*\* False discovery rate (FDR) adjusted p-values  $\leq 0.05$ .

\*\*\* FDR adjusted p-values  $\leq 0.01$ .

Online Supporting Material

Supplemental Table 3. Odds Ratios and 95% confidence intervals<sup>1</sup> for top 10 associations (ranked by nominal p-values among Hispanic Americans) between ion channels related genes and diabetes risk in the WHI-SHARe cohort (n=10,572).

| Locus          | SNP        | Major/Minor Allele | Minor Allele Frequency (AA/HA) <sup>2</sup> |           | African Americans (n=7,287) |         | Hispanic Americans (n=3,285) |                                |
|----------------|------------|--------------------|---------------------------------------------|-----------|-----------------------------|---------|------------------------------|--------------------------------|
|                |            |                    | Cases                                       | Controls  | OR (95% CI)                 | P-value | OR (95% CI)                  | P-value (FDR adjusted p-value) |
| <i>SLC41A2</i> | rs10861279 | T/G                | 0.08/0.03                                   | 0.07/0.07 | 1.10 (0.93,1.29)            | 0.27    | 0.49 (0.34,0.72)             | <0.001<br>(0.01)***            |
| <i>MRS2</i>    | rs7738943  | G/C                | 0.13/0.08                                   | 0.12/0.06 | 1.04 (0.91,1.18)            | 0.58    | 1.57 (1.20,2.05)             | 0.001<br>(0.02)**              |
| <i>MRS2</i>    | rs1056285  | G/A                | 0.14/0.08                                   | 0.14/0.06 | 1.04 (0.92,1.19)            | 0.53    | 1.54 (1.20,2.00)             | 0.001<br>(0.02)**              |
| <i>NIPAI</i>   | rs7174119  | G/A                | 0.22/0.30                                   | 0.22/0.27 | 1.02 (0.91,1.14)            | 0.73    | 1.35 (1.10,1.64)             | 0.002<br>(0.05)**              |
| <i>NIPAI</i>   | rs6606830  | C/T                | 0.21/0.29                                   | 0.22/0.27 | 1.03 (0.92,1.15)            | 0.66    | 1.31 (1.10,1.59)             | 0.01<br>(0.07)*                |

Online Supporting Material

|                |            |     |           |           |                  |      |                  |                 |
|----------------|------------|-----|-----------|-----------|------------------|------|------------------|-----------------|
| <i>SLC41A2</i> | rs11112211 | G/C | 0.09/0.05 | 0.08/0.07 | 1.05 (0.91,1.22) | 0.51 | 0.65 (0.47,0.89) | 0.01<br>(0.13)* |
| <i>SLC41A2</i> | rs10861285 | G/T | 0.05/0.04 | 0.05/0.07 | 0.97 (0.81,1.17) | 0.78 | 0.64 (0.46,0.89) | 0.01<br>(0.13)* |
| <i>SLC41A2</i> | rs10861284 | C/T | 0.06/0.04 | 0.06/0.07 | 1.00 (0.84,1.20) | 0.99 | 0.65 (0.47,0.90) | 0.01<br>(0.13)* |
| <i>FXYD2</i>   | rs479991   | T/C | 0.27/0.19 | 0.28/0.23 | 1.01 (0.90,1.13) | 0.84 | 0.77 (0.64,0.94) | 0.01<br>(0.08)* |
| <i>SLC41A2</i> | rs11112216 | C/T | 0.06/0.04 | 0.06/0.07 | 0.97 (0.81,1.16) | 0.72 | 0.65 (0.47,0.90) | 0.01<br>(0.13)* |

<sup>1</sup>Odds Ratios (OR) and 95% confidence interval (CIs) were computed using dominant model with multivariate logistic regression models.

Adjusted for age, region, and three principal components of global ancestry.

<sup>2</sup>AA: African American; HA: Hispanic American.

\*Nominal p-values  $\leq 0.05$ .

\*\* False discovery rate (FDR) adjusted p-values  $\leq 0.05$ .

\*\*\* FDR adjusted p-values  $\leq 0.01$ .

Online Supporting Material

Supplemental Table 4. Odds Ratios and 95% confidence intervals<sup>1</sup> for significant associations (FDR q-values  $\leq 0.05$ ) between ion channels related genes and diabetes risk stratified by total Mg intake in the WHI-SHARe cohort.

| Locus          | SNP        | African Americans                      |         |                                         |         | Hispanic Americans                     |                                         |                                       |                                         |
|----------------|------------|----------------------------------------|---------|-----------------------------------------|---------|----------------------------------------|-----------------------------------------|---------------------------------------|-----------------------------------------|
|                |            | Low ( $\leq 0.164$ g/day)<br>(n=2,154) |         | High ( $\geq 0.291$ g/day)<br>(n=2,120) |         | Low ( $\leq 0.185$ g/day)<br>(n=1,015) |                                         | High ( $\geq 0.313$ g/day)<br>(n=954) |                                         |
|                |            | OR<br>(95% CI)                         | p-value | OR<br>(95% CI)                          | P-value | OR<br>(95% CI)                         | P-value<br>(FDR<br>adjusted<br>p-value) | OR<br>(95% CI)                        | P-value<br>(FDR<br>adjusted<br>p-value) |
| <i>CLDN19</i>  | rs11590362 | 1.24<br>(0.79,1.93)                    | 0.34    | 1.25<br>(0.81,1.91)                     | 0.31    | 2.01<br>(1.20,3.37)                    | 0.01<br>(0.04)**                        | 1.41<br>(0.80,2.48)                   | 0.24                                    |
| <i>SLC12A3</i> | rs6499858  | 0.996<br>(0.81,1.23)                   | 0.97    | 1.03<br>(0.82,1.28)                     | 0.82    | 0.88<br>(0.64,1.21)                    | 0.44                                    | 0.52<br>(0.36,0.75)                   | <0.001<br>(0.01)***                     |
| <i>SLC12A3</i> | rs8049280  | 1.15<br>(0.91,1.46)                    | 0.25    | 1.02<br>(0.80,1.30)                     | 0.88    | 1.02<br>(0.74,1.41)                    | 0.89                                    | 0.48<br>(0.32,0.73)                   | <0.001<br>(0.01)***                     |

<sup>1</sup>Odds Ratios (OR) and 95% confidence interval (CIs) were computed using dominant model with multivariate logistic regression models.

Adjusted for age, region, and three principal components of global ancestry. Mg: magnesium.

\*Nominal p-values  $\leq 0.05$ .

## Online Supporting Material

\*\* False discovery rate (FDR) adjusted p-values  $\leq 0.05$ .

\*\*\* FDR adjusted p-values  $\leq 0.01$ .
